# Supplementary material for: LCA Analysis Decarbonisation Potential of Aluminium Primary Production by Applying Hydrogen and CCUS Technologies
Source: MDPI journal article supplement (doi:10.3390/hydrogen4020024), 2023-05-20
Supplement: s1 [file s1]

Archive with 1 entries (1 files):
- hydrogen-2329600-supplementary.pdf
