# Supplementary material for: LCA Analysis Decarbonisation Potential of Aluminium Primary Production by Applying Hydrogen and CCUS Technologies
Source: MDPI journal article supplement (doi:10.3390/hydrogen4020024), 2023-05-20
Supplement: s1 [file s1 › hydrogen-2329600-supplementary.pdf]

*Supplementary Material*

# **LCA analysis decarbonisation potential of aluminium primary production by applying Hydrogen and CCUS technologies**

**Antonis Peppas \*, Chrysa Politi, Sotiris Kottaridis and Maria Taxiarchou**

Figures S1-S4 present the LCA models for the four scenarios, developed in the commercial software package “Sphera LCA for Experts”.

The names of the basic processes are shown.

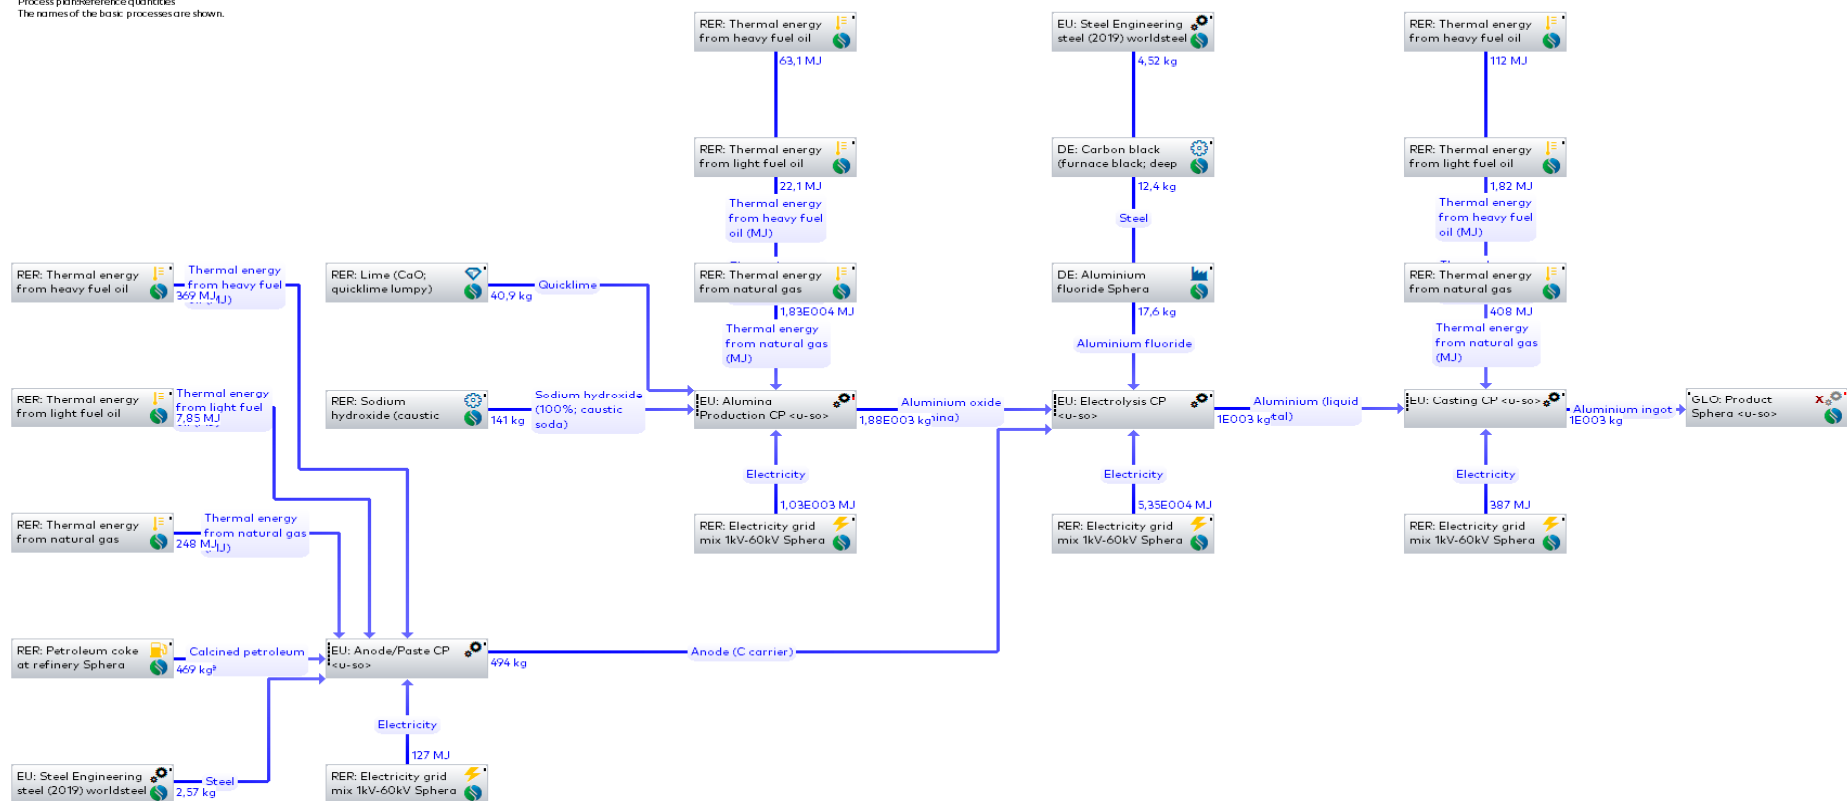

**Figure S1.** LCA model for scenario 1, as developed in “Sphera LCA for Experts”.

The names of the basic processes are shown.

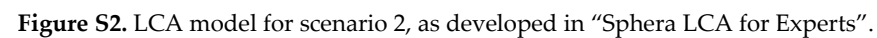

The names of the basic processes are shown.

**Figure S3.** LCA model for scenario 3, as developed in “Sphera LCA for Experts”.

# Primary Aluminium Production - Scenario 4

Process plant reference quantities  
The names of the basic processes are shown.

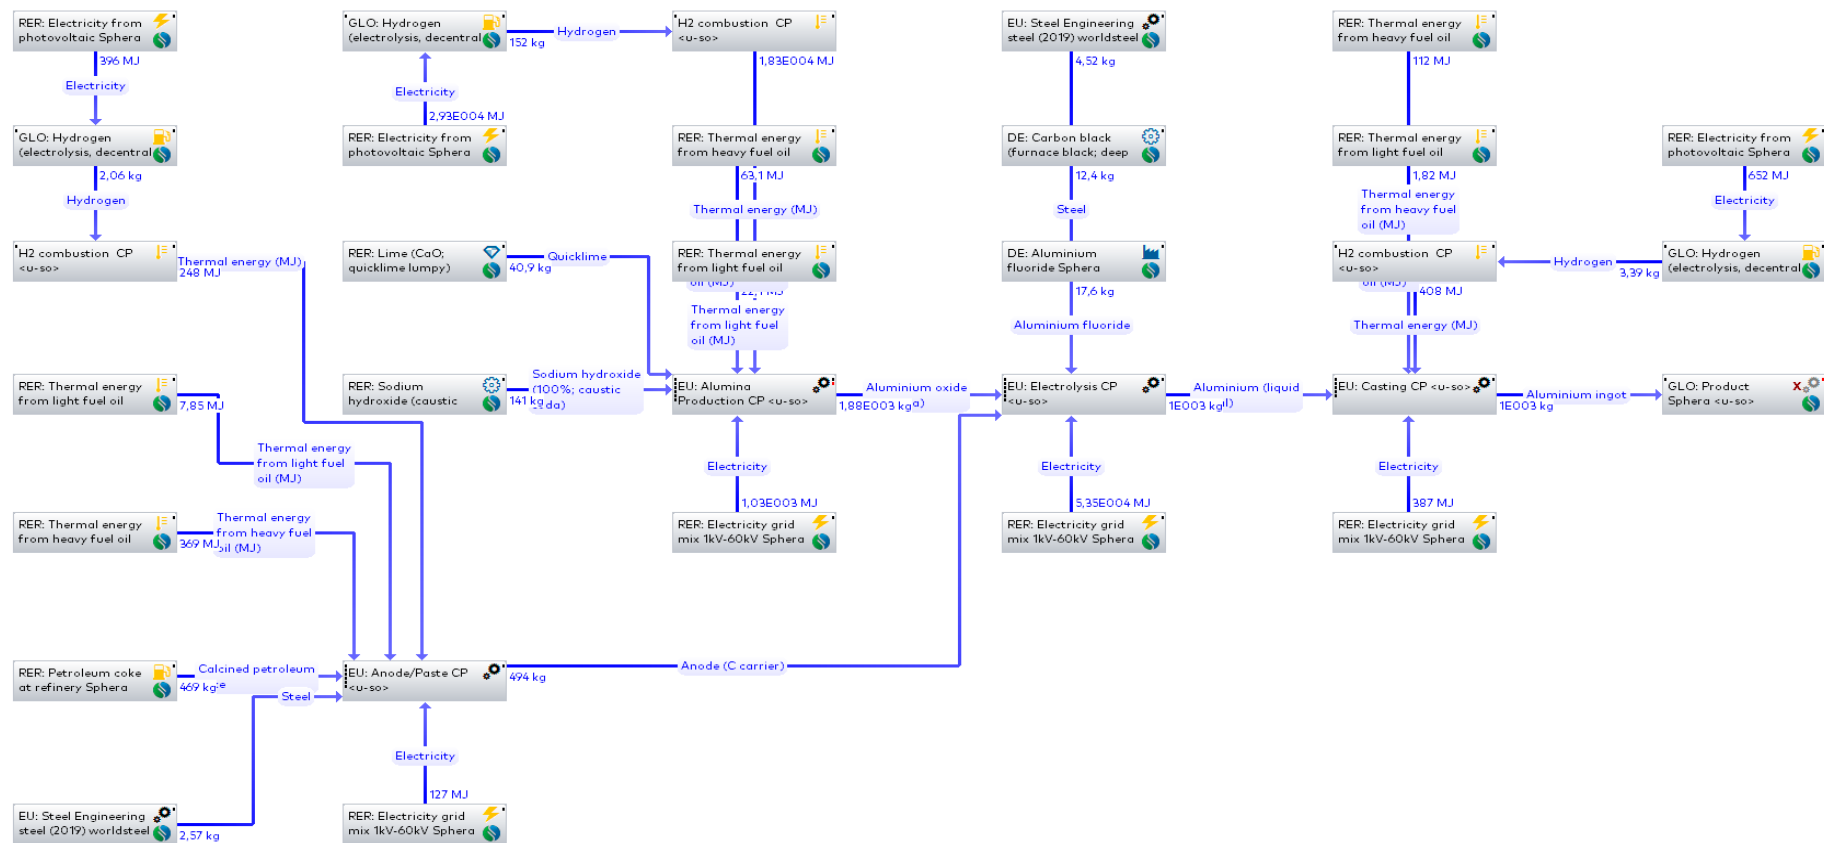

Figure S4. LCA model for scenario 4, as developed in “Sphera LCA for Experts”.
